# Supplementary material
Source: publisher figshare collection journal article supplement (https://acs.figshare.com/ndownloader/files/26509619)
Supplement: Supplementary file 1 [file 26509619]

**Supporting Information**  
***In-situ* Probing of Mass Exchange at the Solid Electrolyte Interphase in Aqueous and Non-aqueous Zn Electrolytes with EQCM-D**

Saida Cora, Suzalmurni Ahmad, Niya Sa\*

\*Department of Chemistry, University of Massachusetts Boston,  
100 William T. Morrissey Blvd, Boston, MA 02125, USA

\*Corresponding author: niya.sa@umb.edu

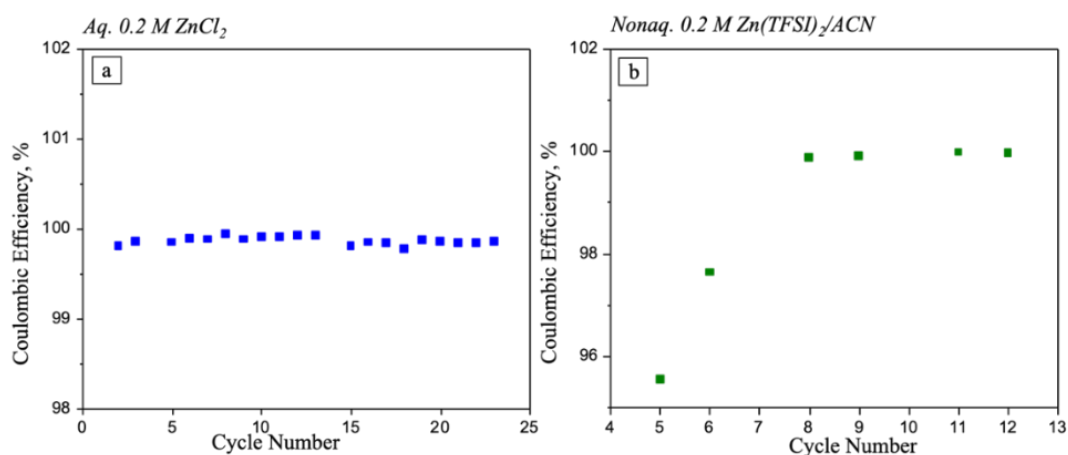

Figure S1. Coulombic efficiency for (a) aqueous 0.2 M ZnCl<sub>2</sub> electrolyte cycled between -0.5 V and 0.8 V at 0.05 V/s (cycles 1, 4 and 14 are not shown); (b) nonaqueous 0.2 M Zn(TFSI)<sub>2</sub> in ACN electrolyte cycled between 3.2 V to -0.5 V for cycles 4-6, 3.5 V to -0.7 V for cycles 7-9, 3.6 V to -1.0 V for cycles 10-12 at 0.05 V/s (cycles 1-3 and 4, 7, 10 are not shown).

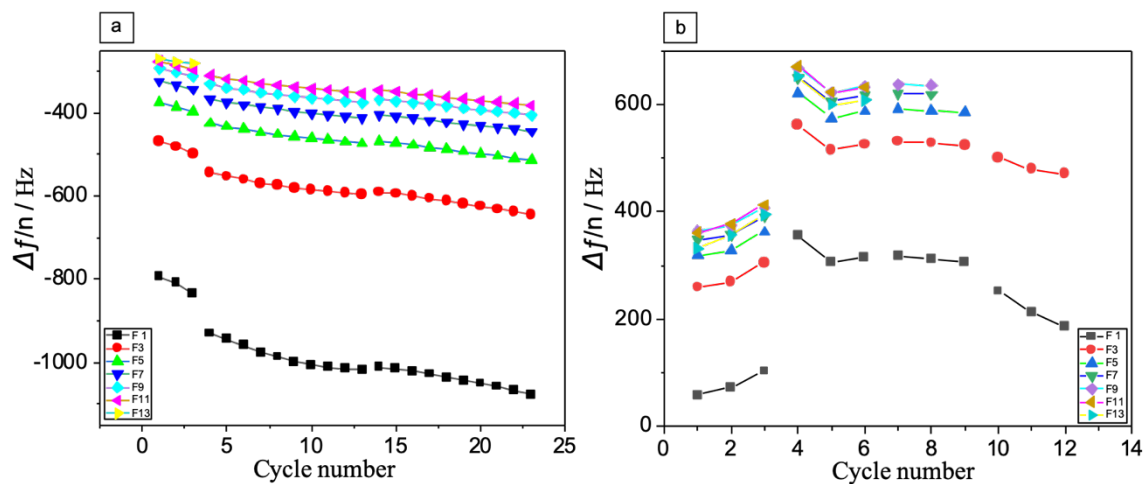

Figure S2. The baseline frequency shift at each CV cycle for aqueous Zn electrolyte (panel a) and non-aqueous Zn electrolyte (panel b) obtained directly from EQCM-D data.

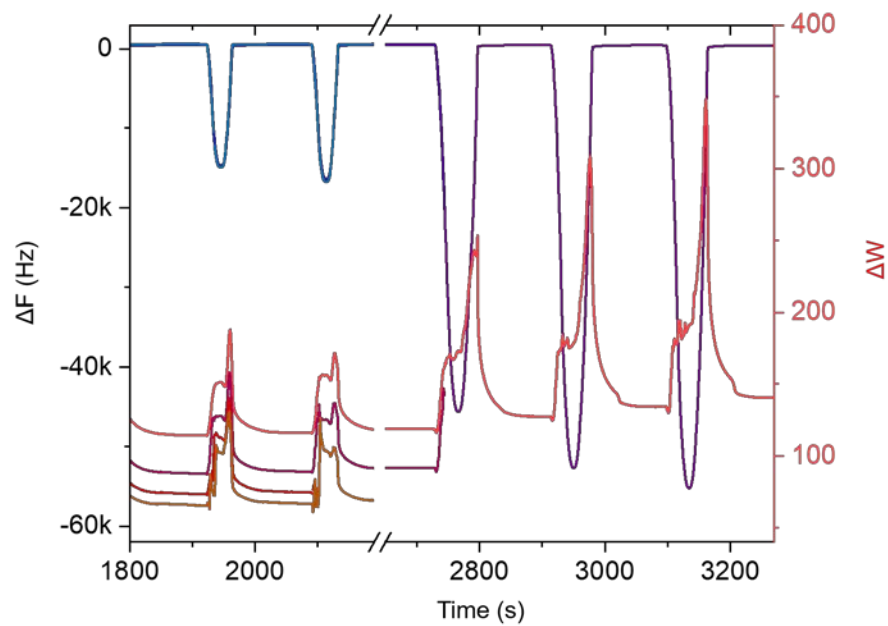

Figure S3. Frequency and dissipation shifts ( $n=3, 5, 7, 9$ ) for non-aqueous  $\text{Zn}(\text{TFSI})_2$  electrolyte for CV cycles 8-12.

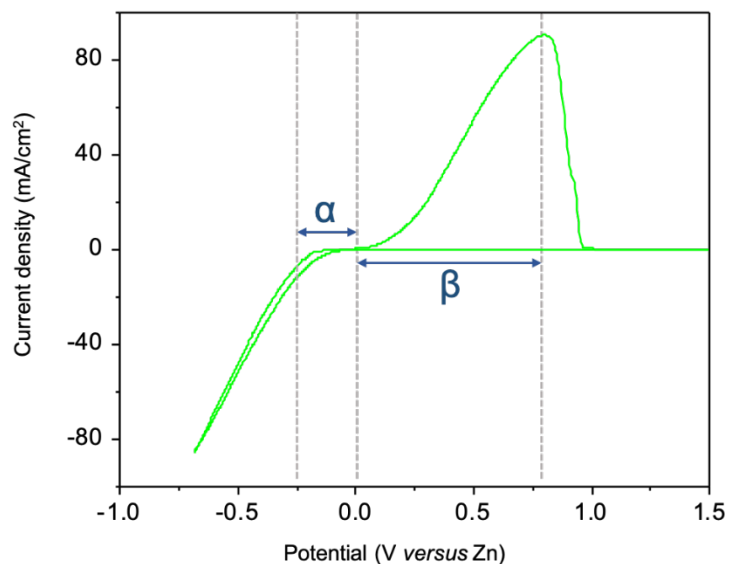

Figure S4. 0.2 M  $\text{Zn}(\text{TFSI})_2$  in ACN 9<sup>th</sup> CV cycle  $\alpha$  and  $\beta$  voltage parameters used to calculate the overpotential. Plating overpotential ( $\eta_\alpha$ ) is defined as the difference between 0 V and voltage point after the plating is initiated while the stripping overpotential ( $\eta_\beta$ ) denotes the difference between 0 V and the highest voltage point during stripping.

### Additional Experimental Results:

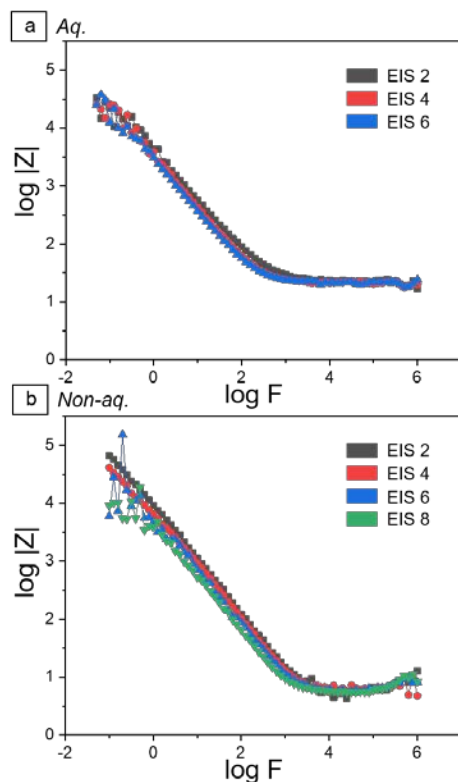

Figure S5. (a) Bode plot representing EIS measured at the 3<sup>rd</sup>, 13<sup>th</sup> and 23<sup>rd</sup> CV cycles for aqueous  $\text{Zn}(\text{Cl})_2$  electrolyte; (b) Bode plot for EIS measured at the 3<sup>rd</sup>, 6<sup>th</sup>, 9<sup>th</sup> and 12<sup>th</sup> CV cycles for non-aqueous  $\text{Zn}(\text{TFSI})_2$  electrolyte.

Table S1. Charge transfer resistance ( $R_{\text{ct}}$ ) for aqueous and non-aqueous Zn electrolytes calculated from the Bode plot (Fig. S1).

|       | Aq $\text{Zn}(\text{Cl})_2$ | Non-aq $\text{Zn}(\text{TFSI})_2$ |
|-------|-----------------------------|-----------------------------------|
|       | $R_{\text{ct}}$ (Ohm)       | $R_{\text{ct}}$ (Ohm)             |
| EIS 2 | 25339.90                    | 65401.63                          |
| EIS 4 | 26507.73                    | 41325.42                          |
| EIS 6 | 32031.53                    | 16803.97                          |
| EIS 8 | -                           | 10216.49                          |

Table S2. CE for 0.2 M aqueous ZnCl<sub>2</sub> electrolyte, cycles 1, 4, 14 are excluded

| CV # | CE, %    |
|------|----------|
| 2    | 99.80237 |
| 3    | 99.85029 |
| 5    | 99.84311 |
| 6    | 99.89153 |
| 7    | 99.87622 |
| 8    | 99.93057 |
| 9    | 99.87803 |
| 10   | 99.90485 |
| 11   | 99.89993 |
| 12   | 99.91833 |
| 13   | 99.91915 |
| 15   | 99.79642 |
| 16   | 99.84397 |
| 17   | 99.83901 |
| 18   | 99.76981 |
| 19   | 99.86632 |
| 20   | 99.85067 |
| 21   | 99.83504 |
| 22   | 99.83547 |
| 23   | 99.85688 |

Table S3. CE for 0.2 M non-aqueous Zn(TFSI)<sub>2</sub>/ACN, cycles 1-3 and 4, 7, 10 are excluded

| CV # | CE, %    |
|------|----------|
| 5    | 95.55349 |
| 6    | 97.6379  |
| 8    | 99.8842  |
| 9    | 99.8995  |
| 11   | 99.97408 |
| 12   | 99.94918 |

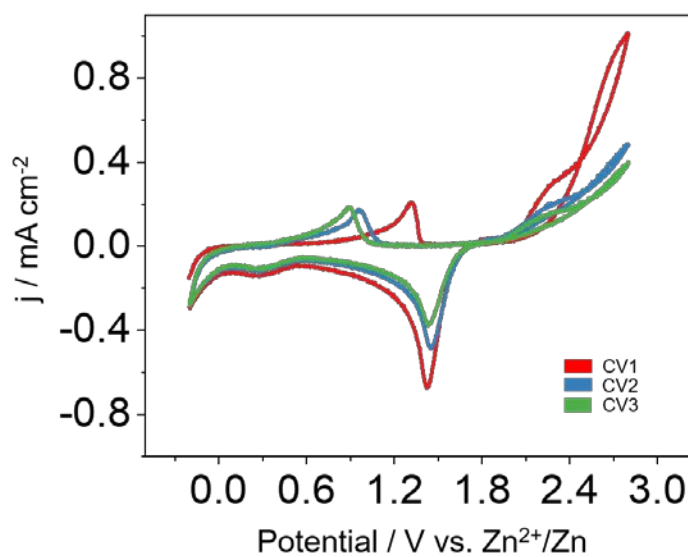

Figure S6. The first 3 CV cycles for Zn electrodeposition from non-aqueous Zn(TFSI)<sub>2</sub> electrolyte.

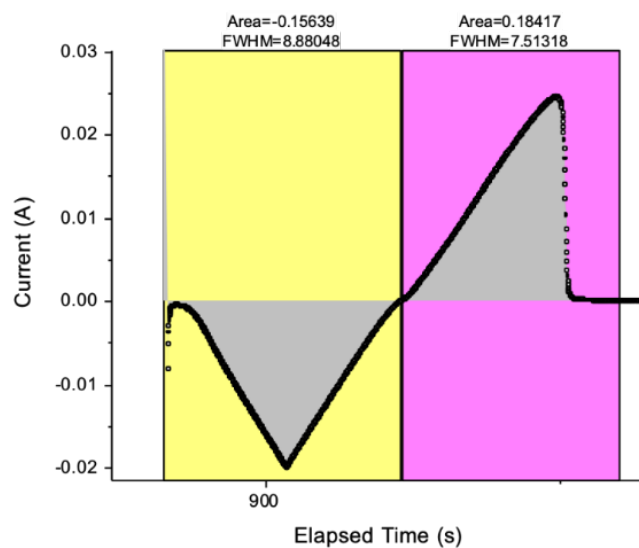

Figure S7. 4<sup>th</sup> CV for aqueous ZnCl<sub>2</sub> electrolyte showing integrated plating and stripping currents used for CE calculations.

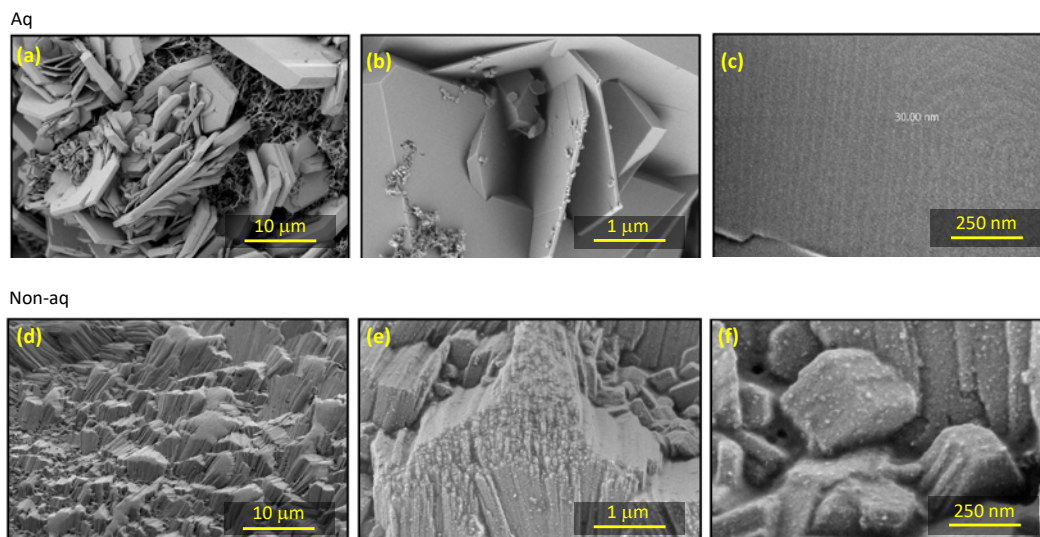

Figure S8. SEM images from the electrochemically deposited Zn of the 0.2 M  $\text{ZnCl}_2$  in  $\text{H}_2\text{O}$  (panels a-c), and the non-aqueous 0.2 M  $\text{Zn}(\text{TFSI})_2$  in ACN (panels d-f).
